# Supplementary material for: Coexpression of HOXA6 and PBX2 promotes metastasis in gastric cancer
Source: publisher site journal article supplement (doi:10.18632/aging.202426), 2021-02-01
Supplement: Supplementary file [file aging-v13i5-202426-supplementary-material-SD1.pdf]

SUPPLEMENTARY FIGURES

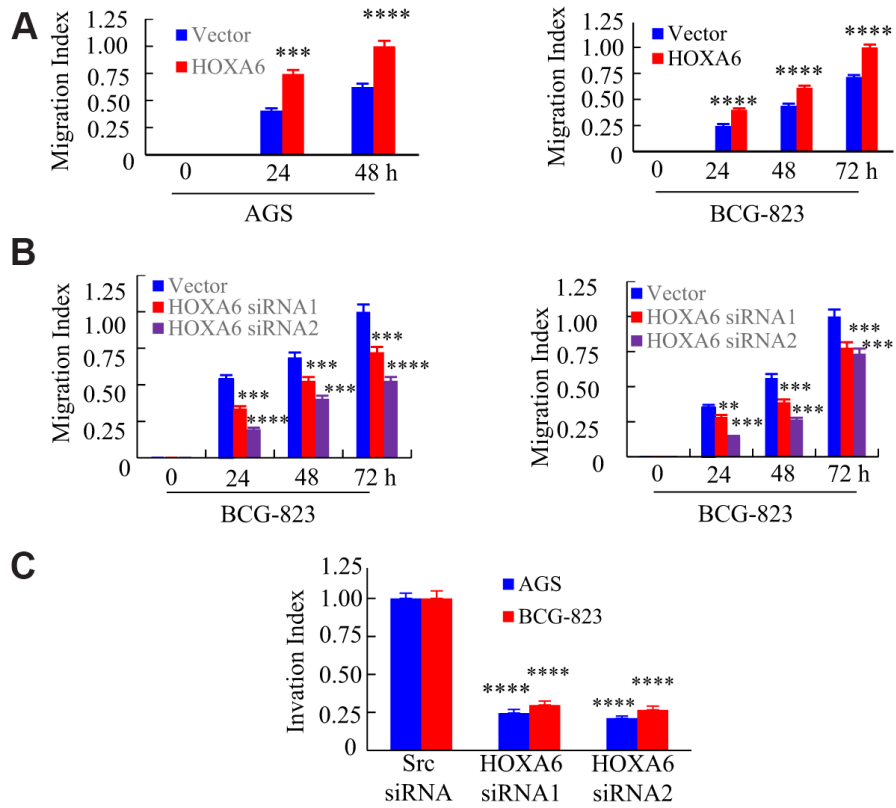

**Supplementary Figure 1. HOXA6 on invasion and migration in GC cells *in vitro*.** (A, B) Histogram showing the percentage of wound closure. (\*\*, P < 0.05; \*\*\*, P < 0.01; \*\*\*\*, P < 0.001 compared with 0 h). (C) Invading cells were counted by microscopy. \*\*\*\*, P < 0.001. Data are repeated at least three independent experiments with similar results on average.

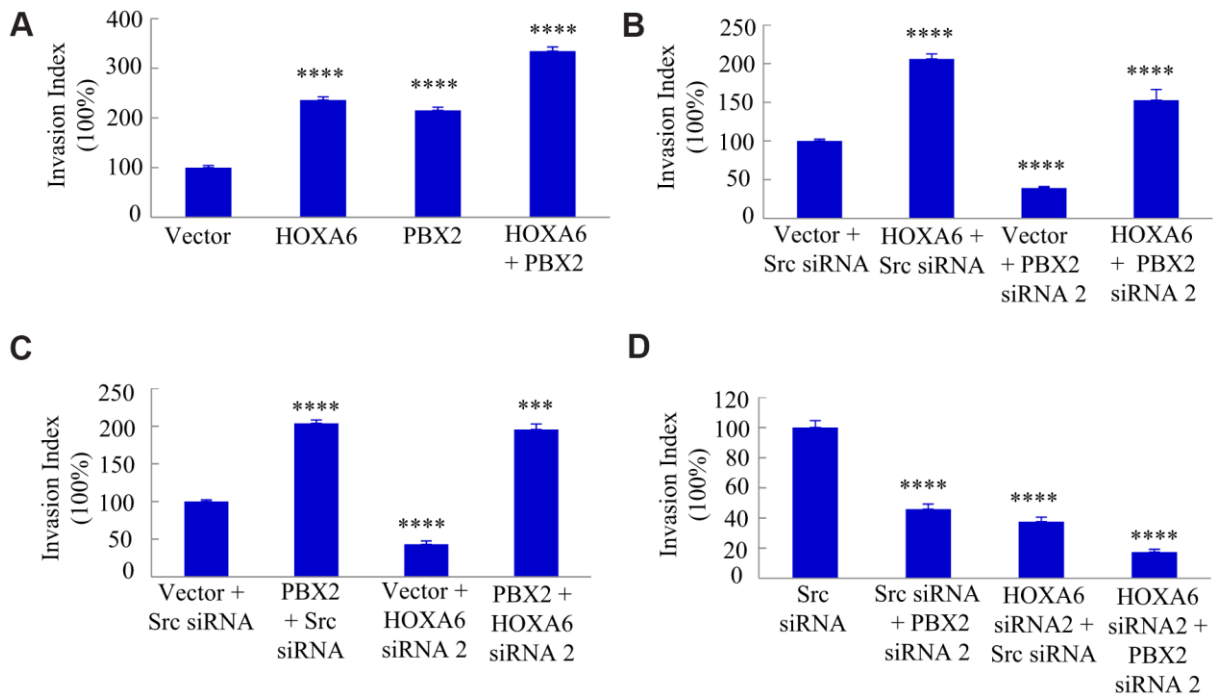

**Supplementary Figure 2. GC cells were evaluated by Transwell invasion assay. (A–D) Invading cells were counted by microscopy. \*\*\*, P<0.01, \*\*\*\*, P<0.001.**
